# Supplementary material for: Incidental Anomalous Left Coronary Artery in a Transplanted Heart
Source: Case Rep Cardiol. 2019 Dec 26;2019:2715896. doi: 10.1155/2019/2715896 (PMC6948275; doi:10.1155/2019/2715896)
Supplement: Supplementary Materials — Video 1: right coronary artery arising from the right coronary sinus. Video 2: anomalous left coronary artery arising from the right coronary sinus. Video 3: right coronary artery and anomalous left coronary artery arising from the right coronary sinus. [file 2715896.f1.zip]

Archive with 4 entries (4 files):
- CaseRepCardiol_Vallabhajosyula_OnlineVideo_1.avi
- CaseRepCardiol_Vallabhajosyula_OnlineVideo_2A.AVI
- CaseRepCardiol_Vallabhajosyula_OnlineVideo_2B.AVI
- CaseRepCardiol_Vallabhajosyula_OnlineVideo_3.avi
